RESEARCH ARTICLE

# Diagnostic utility of a line probe assay for multidrug resistant-TB in smear-negative pulmonary tuberculosis

Binit Kumar Singh<sup>1</sup>, Surendra K. Sharma<sup>1\*</sup>, Rohini Sharma<sup>1</sup>, Vishnubhatla Sreenivas<sup>2</sup>, Vithal P. Myneedu<sup>3</sup>, Mikashmi Kohli<sup>1</sup>, Dinkar Bhasin<sup>1</sup>, Sanjay Sarin<sup>4</sup>

**1** Department of Internal Medicine, All India Institute of Medical Sciences, New Delhi, India, **2** Department of Biostatistics, All India Institute of Medical Sciences, New Delhi, India, **3** National Institute Tuberculosis and Respiratory Diseases, New Delhi, India, **4** Foundation for Innovative New Diagnostics, New Delhi, India

\* [sksharma.aiims@gmail.com](mailto:sksharma.aiims@gmail.com)

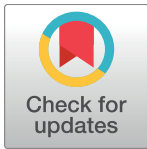

## Abstract

### Objective

To evaluate the performance of Genotype MTBDRplus VER 2.0 in the diagnosis of *Mycobacterium tuberculosis* (MTB) in sputum smear-negative pulmonary TB cases.

### Methods

A total of 572 Ziehl-Neelsen sputum smear-negative samples were selected and subjected to line probe assay (Genotype MTBDRplus VER 2.0), and culture in mycobacterial growth indicator tube (MGIT-960). Immunochromatographic test was used to confirm the MTB-complex (MTBC) in culture-positive samples and phenotypic drug-susceptibility testing was done using MGIT-960.

### Results

The line probe assay was able to diagnose MTBC in 38.2% (213/558) of specimens after excluding 14 nontuberculous mycobacteria. Sensitivity and specificity of the assay were 68.4% and 89.3% respectively, considering MGIT-960 culture as gold standard after excluding contaminated and invalid results. On comparing with composite reference standard, the assay had 71.5% sensitivity and 100% specificity in the diagnosis of tuberculosis. The sensitivity and specificity for detecting resistance to rifampicin (RMP) were 100% and 99.24% respectively and for resistance to isoniazid (INH) were 97.62% and 98.55%, respectively.

### Conclusion

Genotype MTBDRplus VER 2.0 is a rapid and precise diagnostic tool for detection of MTB in sputum smear-negative samples. It also facilitates accurate diagnosis of RMP and INH resistance within turn around-time.

## OPEN ACCESS

**Citation:** Singh BK, Sharma SK, Sharma R, Sreenivas V, Myneedu VP, Kohli M, et al. (2017) Diagnostic utility of a line probe assay for multidrug resistant-TB in smear-negative pulmonary tuberculosis. *PLoS ONE* 12(8): e0182988. <https://doi.org/10.1371/journal.pone.0182988>

**Editor:** Seyed Ehtesham Hasnain, Indian Institute of Technology Delhi, INDIA

**Received:** June 7, 2017

**Accepted:** July 27, 2017

**Published:** August 22, 2017

**Copyright:** © 2017 Singh et al. This is an open access article distributed under the terms of the [Creative Commons Attribution License](https://creativecommons.org/licenses/by/4.0/), which permits unrestricted use, distribution, and reproduction in any medium, provided the original author and source are credited.

**Data Availability Statement:** All relevant data are within the paper and its Supporting Information files.

**Funding:** J. C. Bose Fellowship (SB/S2/JCB-04/2013) of the Department of Science and Technology; Ministry of Science and Technology; Govt. of India granted to SK Sharma. The funders had no role in study design, data collection and analysis, decision to publish, or preparation of the manuscript.

**Competing interests:** The authors have declared that no competing interests exist.

## Introduction

Pulmonary tuberculosis (PTB) is a major public health disease that ranks as the second-most leading cause of death worldwide, after human immunodeficiency virus infection. In 2016, there were 10.4 million new PTB cases globally, with 1.4 million deaths. From a public health prospective, early and rapid diagnosis of PTB is important because of its potential for transmission [1].

Previously, solid media based conventional drug susceptibility testing (DST) was performed for detection of drug resistant *Mycobacterium tuberculosis* (MTB), which could take months to confirm results. After the introduction of broth-based media DST, the results time reduced to weeks. However, the contamination rate limits its utility in a resource-limited setting. To overcome these limitations, in 2008, the World Health Organization (WHO) certified and endorsed the line probe assay (LPA) as a molecular method for the rapid diagnosis of TB and simultaneous detection of rifampicin (RMP) and isoniazid (INH) resistance [2]. However, the previous version of LPA (GenoType MTBDRplus version 1.0) has been evaluated only for high-grade smear-positive specimens and to detect the level of drug resistance in culture isolates. Therefore, the assay can be used for smear-negative sputum samples and scanty positive samples (i.e. those with bacillary loads less than 10 bacilli in 100 fields of the smear) only after isolation becomes culture-positive [3,4]. The latest version of LPA (GenoType MTBDRplus version 2.0, Hain Lifescience, Nehren, Germany) was introduced to overcome these limitations. This new version can detect MTB and their DST patterns for the two first-line drugs RMP and INH in smear-positive (including scanty), smear-negative, and culture-positive samples [5].

The present study aimed to evaluate the diagnostic performance of LPA version 2.0 to detect MTB in smear-negative PTB cases. For smear-negative PTB samples, the sensitivity and specificity of LPA is suboptimal as compared to Mycobacterial Growth Indicator Tube (MGIT)-960 cultures [6]; therefore, a composite reference standard (CRS) was used to evaluate LPA in this study.

## Materials and methods

### Ethics approval

The study was approved by the institutional ethics committee of the All India Institute of Medical Sciences (AIIMS), New Delhi, India.

### Subject recruitment

Patients were recruited from the Directly Observed Treatment Short-Course (DOTS) centres of six chest clinics in four districts of Delhi and the DOTS centre and Medical Out-Patient Department of the AIIMS hospital. Written informed consent was obtained from all patients, or their legal representatives, at the time of enrolment into the study (October 2012 to May 2013). All investigations were conducted at the Intermediate Reference Laboratory (IRL) of the Department of Medicine at AIIMS, New Delhi, India. Since 2011, the IRL has been accredited for LPA (molecular DST) and MGIT-960 (DST) by the National Mycobacteriology Accreditation System of the Central TB Division of the Ministry of Health and Family Welfare, Government of India.

Sputum samples from all patients suspected for TB and those receiving retreatment were subjected to smear microscopy by Ziehl–Neelsen (ZN) staining and liquid culture (LC) as part of the routine diagnostic protocol. Only smear-negative samples were included in the study and further tested by LPA. An immunochromatographic test (ICT) was performed for all

culture-positive samples to rule out non-tuberculous mycobacteria (NTM), using an SD BIOLINE TB Ag MPT64 kit (SD Biotec, Standard Diagnostics, Suwon, Korea) [7]. To minimize bias, all laboratory technicians performing the molecular and reference tests were aware only of their respective laboratory results.

## Specimen processing

Two sputum samples (spot and next day morning) from all patients suspected for TB were collected in 50-mL wide-mouthed sterile falcon tubes according to the guidelines of the Revised National Tuberculosis Control Programme of India [8]. The sputum specimens were processed in a type II bio-safety cabinet at a bio-safety level-3 laboratory. Before decontamination, sputum samples were subjected to direct smear microscopy, using the ZN method. The samples were decontaminated by the NALC-NaOH method (final NaOH concentration, 1%) [9]. After decontamination, the spot samples were inoculated in LC and the morning samples were subjected to LPA.

## Liquid culture

An MGIT-960 tube was prepared by adding 0.8 mL oleic acid–albumin–dextrose–catalase PANTA (Becton Dickinson). A 0.5-mL volume of processed sample was inoculated into the respective tube and incubated at 37°C in an automated BACTEC MGIT-960 (Becton Dickinson) instrument for a maximum period of 42 days, with scheduled regular monitoring. The time-to-positivity was recorded for the positive-flagged MGIT-960 tubes. ZN microscopy was performed to visualise the serpentine cord formation (typical tight, rope-like aggregates morphology that MTB exhibit during growth in liquid media) along with sterility on brain heart infusion agar media [10]. Indirect DST was performed using the final critical concentration of anti-TB drugs, i.e. 0.1 µg/ml INH and 1.0 µg/ml RMP [11].

## LPA

Mycobacterial DNA was extracted using a GenoLyse kit (Hain Lifescience, Nehren, Germany)-based manual method; however, instead of the 0.5 mL recommended by the manufacturer, we used 1 mL of decontaminated sputum sample. Polymerase chain reaction (PCR) was performed using pre-made amplification mixes (amplification mix A and amplification mix B) that contained all the necessary components. Hybridization was performed using an automated GT Blot 48 device (Hain Lifescience, Nehren, Germany), and the results were interpreted based on the operating manual provided by the manufacturer [5, 6].

## Patient categorization

On the basis of a CRS algorithm (S1 Table), the patients were categorized into two groups: TB cases [either culture-positive or culture-negative with other evidence, such as clinical symptoms and radiological findings, and response to anti-tuberculosis treatment (ATT) after 2 months of being positive] and non-TB cases (clinically suspected of TB; culture may be positive or negative but other evidence was negative and the patients did not respond to ATT).

## Statistical analysis

Statistical analysis was performed using Stata 11.2 (College Station, TX, USA). All data are presented as frequency (percentage) and mean ( $\pm$  SD). CRS was used as the gold standard to evaluate the sensitivity, specificity, positive predictive value (PPV), and negative predictive value (NPV) based on the culture results and the clinical and radiological findings.

### Results

A total of 572 sputum smear-negative PTB suspects, including retreated patients, were recruited in the study. The mean age of the patients was 34.4 years (SD, 15.5 years); 341 of the patients were male and 231 were female. Forty-eight specimens from the patients were excluded from the study because they produced invalid results with TUB band (it represents the presence of the *M. tuberculosis* complex in LPA strips), culture contamination, and the presence of NTMs (Fig 1 and S1 Fig)

Among all the patients' specimens, 281 (49.1%) were found to be culture-positive, 263 (46%) were culture-negative, and 28 (4.9%) showed contamination as assessed by LC method. For the LPA in culture-positive samples, 180 (32.3%) showed valid results with TUB bands (S1 Fig); 83 (14.9%) yield valid results without TUB bands. Among the culture-negative and contaminated samples, 28 (5%) and five (0.9%) showed valid results with TUB bands, respectively (S2 Table). The sensitivity and specificity of this LPA kit to detect MTB (TUB bands) in all smear-negative samples with culture as a reference standard were 68.4%; 180/263 (95% CI: 62.5–74%) and 89.3%; 233/261 (95% CI: 84.9–92.8%), respectively (Table 1). However, the LPA detected MTB in 213 (38.2%) samples, of which 180 (32.3%) were culture-positive, 28 (5%) were culture-negative, and five (0.9%) were contaminated (S2 Table). Therefore, when the LPA was compared with the CRS algorithm, its sensitivity and specificity increased to 71.5% (208/291; 95% CI: 65.9–76.6%) and 100% (233/233; 95% CI: 93.2–100%), respectively.

The performance of the LPA to detect RMP and INH resistance was evaluated by comparing it with the LC (MGIT-960)-based DST results (Table 2). The sensitivity and specificity of LPA to detect RMP resistance were 100% and 99.2%, whereas those to detect INH resistance were 97.6% and 98.6%, respectively.

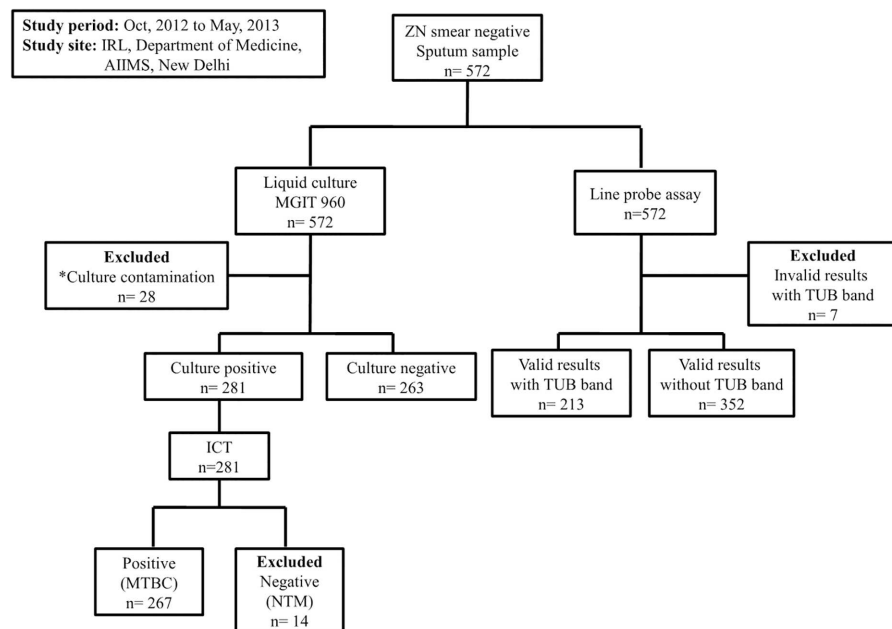

**Fig 1. Schematic representation of work flow.** ZN: Ziehl–Neelsen, MGIT: Mycobacteria Growth Indicator Tube, MTBC: *Mycobacterium tuberculosis* complex, NTM: non-tuberculous mycobacteria, ICT: Immunochromatographic test, Valid result with TUB band, LPA strips are interpretable with MTB complex band; Invalid result with TUB band, LPA strips are not interpretable with MTB complex band; Valid result without TUB band, LPA strips without MTB complex band; \* one contaminated culture was found to invalid results with TUB.

<https://doi.org/10.1371/journal.pone.0182988.g001>

**Table 1. Diagnostic accuracy of LPA version 2.0 with and without CRS.**

| Method                                                      | Performance (%), No. of positive samples/ total no. of samples (95% CI) |                           |                           |                           |
|-------------------------------------------------------------|-------------------------------------------------------------------------|---------------------------|---------------------------|---------------------------|
|                                                             | Sensitivity                                                             | Specificity               | PPV                       | NPV                       |
| Genotype MTBDR plus VER 2.0 (culture as reference standard) | 68.4, 180/263 (62.5–74)                                                 | 89.3, 233/261 (84.9–92.8) | 86.5, 180/208 (81.1–90.9) | 73.7, 261/316 (68.5–78.5) |
| Genotype MTBDR plus VER 2.0 (CRS as reference standard)     | 71.5, 208/291 (65.9–76.6)                                               | 100, 233/233 (93.2–100)   | 100, 208/208 (98.2–100)   | 73.7, 233/316 (68.5–78.5) |

NPV: negative predictive value; PPV: positive predictive value; CRS: Composite Reference Standard

<https://doi.org/10.1371/journal.pone.0182988.t001>

**Table 2. Performance parameter of LPA version 2.0.**

| MTBDR plus VER 2.0 | DST result (MGIT 960) (n: 180) |                  |                  |                  | Performance % (95% CI) |                  |                  |                  |
|--------------------|--------------------------------|------------------|------------------|------------------|------------------------|------------------|------------------|------------------|
|                    | RMP <sub>r</sub>               | RMP <sub>s</sub> | INH <sub>r</sub> | INH <sub>s</sub> | Sensitivity            | Specificity      | PPV              | NPV              |
| RMP <sub>r</sub>   | 49                             | 01               | -                | -                | 100 (92.6–100)         | 99.2 (95.8–99.9) | 98 (89.3–99.7)   | 100 (97.2–100)   |
| RMP <sub>s</sub>   | 00                             | 130              | -                | -                |                        |                  |                  |                  |
| INH <sub>r</sub>   | -                              | -                | 41               | 02               | 97.6 (87.3–99.6)       | 98.6 (94.8–99.7) | 95.4 (84.5–99.7) | 99.3 (95.2–99.4) |
| INH <sub>s</sub>   | -                              | -                | 01               | 136              |                        |                  |                  |                  |

RMP<sub>r</sub>: resistant to rifampin, RMP<sub>s</sub>: susceptible to rifampin, INH<sub>r</sub>: resistant to isoniazid, INH<sub>s</sub>: susceptible to Isoniazid, NPV: negative predictive value, PPV: positive predictive value, Only 180 samples have both MGIT DST and genotypic DST results and hence were included.

<https://doi.org/10.1371/journal.pone.0182988.t002>

The frequency of mutations was calculated based on all valid LPA results with TUB bands (Table 3, n = 213). In total, 59 (27.6%) strains were RMP-resistant and the most widespread mutation in *rpoB* was the S531L amino acid substitution (n = 43, 72.9%), followed by mutations in codons 530–533 (n = 6, 10.1%), codons 526–529 (n = 3, 5.1%), codons 513–519 (n = 3, 5.1%), D516V (n = 1, 1.7%), codons 510–517 (n = 1, 1.7%), codons 510–513 (n = 1, 1.7%), and codons 505–509 (n = 1, 1.7%). Fifty-two (24%) strains were INH-resistant. Among them, 44 were *katG* resistant, four were *inhA* resistant, and four were both *katG* and *inhA* resistant. The

**Table 3. Pattern of gene mutations in *Mycobacterium tuberculosis* strains using LPA version 2.0.**

| Mutation pattern of RIF ( <i>rpoB</i> ) obtained from Genotype MTBDR plus V.2 assay (59/213)               |          |                |                |               |
|------------------------------------------------------------------------------------------------------------|----------|----------------|----------------|---------------|
| Gene                                                                                                       | Band     | Mutation point | No. of samples | Frequency (%) |
| <i>rpoB</i> (n:59)                                                                                         | WT1      | 505–509        | 1              | 1.7           |
|                                                                                                            | WT2      | 510–513        | 1              | 1.7           |
|                                                                                                            | WT2/ WT3 | 510–517        | 1              | 1.7           |
|                                                                                                            | WT3/ WT4 | 513–519        | 3              | 5.1           |
|                                                                                                            | WT7      | 526–529        | 3              | 5.1           |
|                                                                                                            | WT8      | 530–533        | 6              | 10.1          |
|                                                                                                            | MUT1     | D516V          | 1              | 1.7           |
|                                                                                                            | MUT3     | S531L          | 43             | 72.9          |
| Mutation pattern of INH ( <i>katG</i> & <i>inhA</i> ) obtained from Genotype MTBDR plus V.2 assay (52/213) |          |                |                |               |
| <i>katG</i> (n:48)                                                                                         | WT       | 315            | 3              | 5.8           |
|                                                                                                            | MUT1     | S31T           | 45             | 86.5          |
| <i>inhA</i> (n:4)                                                                                          | WT       | -15            | 1              | 1.9           |
|                                                                                                            | MUT1     | C15T           | 3              | 5.8           |

WT: wild type probe, MUT: mutation probe, C: cysteine, D: aspartic acid, L: leucine, S: serine, T: threonine, V: valine, all 213 results of LPA were included.

<https://doi.org/10.1371/journal.pone.0182988.t003>

most prevalent mutation in *katG* resulted in an amino acid substitution (S315T) in 45 (86.5%) strains. Three (5.8%) strains had unknown amino acid substitution mutations, three (5.8%) had an *inhA* C15T amino acid substitution, and one (1.9%) had an unknown amino acid substitution mutation at the -15 position of *inhA* (Table 3).

## Discussion

For several decades, ZN smear microscopy has been the mainstay in the diagnosis of PTB, particularly in resource-limited, high-TB-burden countries such as India [12]. However, the technique has low sensitivity [13], is highly observer-dependent, and is incapable of distinguishing between MTBC and NTM strains. In 2009, following the WHO recommendation, fluorescent light-emitting diode (LED) microscopy, which has a higher sensitivity to detect TB bacilli, was intended to replace ZN microscopy. However, until 2014, only 7% of microscopy centres globally were equipped with LED microscopes [14]. Hence, several rapid diagnostic tests have emerged for PTB diagnosis. Here, we evaluated the utility of the latest LPA (version 2.0) for the rapid diagnosis of sputum smear-negative PTB.

The aim of our study was to evaluate the utility of the latest version of LPA for the diagnosis of sputum smear-negative PTB patients. Almost similar sensitivity (66.7%) with high specificity (92.3%) was observed in a study conducted by Ninan et al. [15] for the detection of MTB with MGIT-960 culture as reference standard. Another study conducted by Meaza et al. [16] showed both higher sensitivity (77.8%) and specificity (97.9%). The sensitivity from these studies is comparable to the present study, however, higher specificity of these previous studies could be attributed to the fact that they had very small sample size for smear negative sample ( $n = 29$  and  $n = 18$  respectively).

CRS is a new concept used to evaluate the diagnostic accuracy of any test, especially in TB. It takes into account the clinical symptoms, other available tests, and response to treatment to define correctly whether a case is TB. In the comparison with CRS, we observed an increase in the sensitivity and specificity of the LPA, compared to that in comparison with MGIT-960. Twenty-eight cases were culture negative but TB positive according to the CRS algorithm. LPA produced valid results for these 28 cases, of which nine were multidrug resistant tuberculosis (MDR-TB) cases. This is important; because the undiagnosed patients would otherwise not have received treatment based on acid-fast Bacilli and culture-negative reports, and would have further led to increased morbidity and mortality.

Previous studies conducted using LPA version 1.0 reported much lower detection rates of MTBC (only 14–16%) in smear-negative specimens [17]. This discrepancy could be because LPA version 2.0 uses a Genolyse kit for MTB genomic DNA isolation, instead of the mechanical methods used by version 1.0, which decreases the chance of cross-contamination and increases the quality of the amplified genomic DNA, producing better results. Moreover, in our study, we used larger volumes of decontaminated sputum sample (1 mL) as compared to that recommended by the manufacturer (0.5 mL). This might have resulted in higher detection rates of MTB by LPA from the previous studies conducted by Ninan et al [15] and Meaza et al [16]; however, it warrants validation in future studies and the possible re-evaluation of the assay's methodology.

LPA not only detects the presence of MTBC in the samples, but also reveals the resistance pattern against two first-line drugs, RMP and INH, with high accuracy. The sensitivity and specificity of the newer LPA to detect RMP and INH susceptibility was the same as that reported previously (Table 2) [18,19]. For RMP resistance, excellent percentage accuracy was found in the detection of mutation related to 81 bp region of *rpoB* gene [17] but for INH resistance, low accuracy was observed [17, 20]. The possible reason for very few discrepant and low

accuracy results could have been caused by some masked mutations in the genomic regions of *rpoB*, *katG*, and *inhA* [21,22].

To differentiate between MTBC and NTM using ICT on culture samples, in the present study LPA revealed a specificity of 100% and these findings are in agreement with those of previously published studies [9, 23, 24]. According to an Indian study, the range of NTM varies from 0.7 to 34% in PTB samples [25]. Our study reflected the percentage of NTM (2.5%) within this range.

In our study, LC (MGIT-960) was used as a reference standard along with CRS to detect MTB, because of its higher culture-positivity rates compared with conventional solid culture medium (LJ medium). Furthermore, LC has the added advantage of shorter turn-around time [26]. The proportion of invalid results was significantly lower, i.e., 1.3% with LPA version 2.0, as compared to contamination rates of LC (5%).

The landscape of TB diagnosis has changed over the past few years because of the emergence of rapid diagnostic tests, such as LPA and Xpert MTB/RIF. LPA has a short turn-around time of 24–48 hours to detect MTB and the simultaneous detection of RIF and INH resistance. Moreover, Xpert MTB/RIF only reports the RMP sensitivity status [27]. In the present study, 13 samples were RMP-sensitive and INH-resistant. Such patients would be missed if only Xpert MTB/RIF is used. Furthermore, 20 of the culture isolates were RMP-resistant and INH-sensitive. Such patients are likely to be falsely classified as having MDR-TB, if only Xpert MTB/RIF is used, and could lead to overestimation of MDR-TB cases. Nevertheless, there are a few major drawbacks of LPA. These include its high operational costs, requirement for skilled technicians, and the need for regular maintenance.

These findings suggest that even though the WHO does not recommend LPA for smear-negative PTB samples, optimal diagnostic accuracy was observed in the present study. Hence, LPA may be a useful diagnostic tool to detect smear-negative PTB cases with additional drug susceptibility testing for both RIF and INH.

## Conclusion

In conclusion, the latest version of LPA has an optimal sensitivity of 71.5% to detect MTBC in smear-negative sputum samples. It also provides rapid information on drug susceptibility of MTBC to RMP and INH. This test can be recommended as a rapid molecular diagnostic test for sputum smear-negative pulmonary TB cases. Future studies should focus on confirming these findings in a large patient cohort.

## Supporting information

**S1 Table. Diagnostic algorithm under composite reference standard (CRS) for patients' categorization.**

(DOCX)

**S2 Table. Diagnostic accuracy of Genotype MTBDR plus VER 2.0 with liquid culture (BACTEC MGIT-960).**

(DOCX)

**S1 Fig. Schematic representation of the study design.**

(TIFF)

## Acknowledgments

Authors acknowledge the help of Mr Vinod Raikwar and Ms Jigyasa Chaubey for managing and initial processing the specimens. We are also thankful to Mr Sukhbir Singh for sample

collection. We are very thankful to the AIIMS administration for providing infrastructure and lab space. We would also like to thank the faculty, residents and students from the Departments of Internal Medicine for sending the samples and contributing in the study.

## Author Contributions

**Conceptualization:** Binit Kumar Singh, Surendra K. Sharma.

**Data curation:** Binit Kumar Singh, Surendra K. Sharma, Rohini Sharma, Vishnubhatla Sreenivas, Mikashmi Kohli.

**Formal analysis:** Binit Kumar Singh, Surendra K. Sharma, Rohini Sharma, Vishnubhatla Sreenivas, Mikashmi Kohli, Dinkar Bhasin.

**Funding acquisition:** Surendra K. Sharma.

**Investigation:** Surendra K. Sharma.

**Methodology:** Binit Kumar Singh, Rohini Sharma.

**Project administration:** Surendra K. Sharma, Vithal P. Myneedu, Mikashmi Kohli, Sanjay Sarin.

**Resources:** Surendra K. Sharma, Vithal P. Myneedu.

**Software:** Vishnubhatla Sreenivas.

**Supervision:** Surendra K. Sharma, Vithal P. Myneedu, Sanjay Sarin.

**Validation:** Binit Kumar Singh, Rohini Sharma.

**Visualization:** Binit Kumar Singh, Surendra K. Sharma, Rohini Sharma, Vithal P. Myneedu, Sanjay Sarin.

**Writing – original draft:** Binit Kumar Singh, Dinkar Bhasin.

**Writing – review & editing:** Surendra K. Sharma, Vishnubhatla Sreenivas, Vithal P. Myneedu, Mikashmi Kohli, Dinkar Bhasin.

## References

1. World Health Organization. Global Tuberculosis Report. WHO, Geneva, Switzerland. 2016.
2. World Health Organization. Molecular line probe assays for the rapid screening of patients at risk of multidrug-resistant tuberculosis (MDR-TB). Policy statement. WHO, Geneva, Switzerland. 2008; [http://www.who.int/tb/laboratory/lpa\\_policy.pdf](http://www.who.int/tb/laboratory/lpa_policy.pdf)
3. Yadav R N, Singh B K, Sharma S K, Sharma R, Soneja M, Sreenivas V, et al. Comparative Evaluation of GenoType MTBDRplus Line Probe Assay with Solid Culture Method in Early Diagnosis of Multidrug Resistant Tuberculosis (MDR-TB) at a Tertiary Care Centre in India. PLoS ONE 2013; 8(9): e72036. <https://doi.org/10.1371/journal.pone.0072036> PMID: 24039735
4. Hillemann D, Weizenegger M, Kubica T, Richter E, Niemann S. Use of the GenoType MTBDR assay for rapid detection of rifampin and isoniazid resistance in Mycobacterium tuberculosis complex isolates. J. Clin. Microbiol. 2005; 43:3699–3703. PMID: 16081898
5. Hain Lifescience GmbH. Nehren, Germany. GenoType MTBDRplus, version 2.0 [product insert]. <http://www.hain-lifescience.de/en/instructions-for-use.html>
6. Crudu V, Stratan E, Romancenco E, Allerheiligen v, Hillemann A, Moraru N. First evaluation of an improved assay for molecular genetic detection of tuberculosis as well as rifampin and isoniazid resistances. J. Clin. Microbiol. 2012; 50 (4):1264–1269. <https://doi.org/10.1128/JCM.05903-11> PMID: 22301019
7. Martin A, Bombeek D, Fissette K, de Rijk P, Hernández-Neuta I, Del Portillo P. et al. Evaluation of the BD MGIT TBc Identification Test (TBc ID), a rapid chromatographic immune assay for the detection of Mycobacterium tuberculosis complex from liquid culture: J Microbiol Meth. 2011; 84:255–257.



8. Central TB Division, Directorate General of Health Services, Ministry of Health & Family Welfare, Government of India. Revised National Tuberculosis Programme, DOTS-Plus Guidelines. 2010; [http://www.tbcindia.nic.in/pdfs/DOTS\\_Plus\\_Guidelines\\_Jan2010.df](http://www.tbcindia.nic.in/pdfs/DOTS_Plus_Guidelines_Jan2010.df). Accessed 2013 July 15.
9. Buyankhishig B, Oyuntuya T, Tserelmaa B, Sarantuya J, Lucero M G, Mitarai S. Rapid molecular testing for multi-resistant tuberculosis in mongoliya: A diagnostic accuracy study. *Int J Mycobacteriol*. 2012; 40–44. <https://doi.org/10.1016/j.ijmyco.2012.01.007> PMID: 26786948
10. Allen B W. Tuberculosis bacteriology in developing countries. *Med Lab Sci* 1984; 41:400–409. PMID: 6439973
11. Berner P, Palicova F, Rusch-Gerdes S, Drugeon H B, Pfyffer G E. Multi-center evaluation of fully automated BACTEC mycobacterial growth indicator tube system MGIT 960 for susceptibility testing of *Mycobacterium tuberculosis*. *J Clin Microbiol* 2002; 40: 150–154. <https://doi.org/10.1128/JCM.40.1.150-154.2002> PMID: 11773109
12. Aber V R, Allen B W, Mitchison D A, Ayuma P, Edwards E A, Keyes A B. Quality control in tuberculosis bacteriology. 1. Laboratory studies on isolated positive cultures and the efficiency of direct smear examination. *Tubercle*. 1980; 61(3):123–133. PMID: 6777919
13. World Health Organization. Fluorescent Light Emitting Diode (Led) Microscopy For Diagnosis Of Tuberculosis. Policy statement. WHO, Geneva, Switzerland. 2010; [http://www.who.int/tb/laboratory/who\\_policy\\_led\\_microscopy\\_july10.pdf](http://www.who.int/tb/laboratory/who_policy_led_microscopy_july10.pdf)
14. World Health Organization. Global Tuberculosis Report. WHO, Geneva, Switzerland. 2015.
15. Ninan MM, Gowri M, Christopher DJ, Rupali P, Michael JS. The diagnostic utility of line probe assays for multidrug-resistant tuberculosis, *Pathogens and Global Health*, 2016. <https://doi.org/10.1080/20477724.2016.1214350> PMID: 27499239
16. Meaza A, Kebede A, Yaregal Z, Dagne Z, Moga S, Yenew B, et al. Evaluation of genotype MTBDRplus VER 2.0 line probe assay for the detection of MDR-TB in smear positive and negative sputum samples. *BMC Infectious Diseases* (2017) 17:280. <https://doi.org/10.1186/s12879-017-2389-6> PMID: 28415989
17. Barnard M, Albert H, Coetzee G, O'Brien R, Bosman M E. Rapid molecular screening for multidrug-resistant tuberculosis in a high-volume public health laboratory in South Africa. *Am. J. Respir. Crit Care Med*. 2008; 177:787–792. <https://doi.org/10.1164/rccm.200709-1436OC> PMID: 18202343
18. Ling D I, Zwerling A A, Pai M. GenoType MTBDR assays for the diagnosis of multidrug-resistant tuberculosis: a meta-analysis. *Eur. Respir. J*. 2008; 32:1165–1174. <https://doi.org/10.1183/09031936.00061808> PMID: 18614561
19. Parsons L M, Somoskvi A, Gutierrez C, Lee E, Paramasivan CN, Abimiku A. et al. Laboratory diagnosis of tuberculosis in resource poor countries: challenges and opportunities. *Clin. Microbiol. Rev*. 2011; 24: 314–350. <https://doi.org/10.1128/CMR.00059-10> PMID: 21482728
20. Huang WL, Chen HY, Kuo YM, Jou R. Performance Assessment of the GenoType MTBDRplus Test and DNA Sequencing in Detection of Multidrug-Resistant *Mycobacterium tuberculosis*. *J. Clin Microbiol*, 2009; 2520–2524.
21. Heep M, Rieger U, Beck D, Lehn N. Mutations in the beginning of the *rpoB* gene can induce resistance to rifamycins in both *Helicobacter pylori* and *Mycobacterium tuberculosis*. *Antimicrob. Agents Chemother*. 2000; 44:1075–1077. PMID: 10722516
22. Sandgren A, Strong M, Muthukrishnan P, Weiner B K, Church G M, Murray M B. Tuberculosis drug resistance mutation database. *PLoS Med*. 2009; 6:e132– e136.
23. Marzouk M, Kahla IB, Hannachi N, Ferjeni A, Salma WB, Ghezal S, et al. Evaluation of an immunochromatographic assay for rapid identification of *Mycobacterium tuberculosis* complex in clinical isolates. *Diagn Microbiol Infect Dis*. 2011; 69:396–399. <https://doi.org/10.1016/j.diagmicrobio.2010.11.009> PMID: 21396535
24. Martin A, Bombeeck D, Mulders W, Fissette K, de Rijk P, Palomino JC. Evaluation of the TB Ag MPT64 Rapid test for the identification of *Mycobacterium tuberculosis* complex. *Int J Tuberc Lung Dis*. 2011; 15(5):703–705. <https://doi.org/10.5588/ijtld.10.0474> PMID: 21756526
25. Paramasivan C N, Govindan D, Prabhakar R, Somasundaram P R, Subbammal S, Tripathy S. Species level identification of non-tuberculous mycobacteria from south Indian BCG trial area during 1981. *Tubercle*. 1985; 66: 9–15. PMID: 3984041
26. World Health Organization. Use of Liquid TB Culture and Drug Susceptibility Testing (DST) in Low and medium Income Setting. Summary report of the Expert Group Meeting on the use of liquid culture media. WHO, Geneva, Switzerland. 2007; [http://www.who.int/tb/laboratory/use\\_of\\_liquid\\_tb\\_culture\\_summary\\_report.pdf](http://www.who.int/tb/laboratory/use_of_liquid_tb_culture_summary_report.pdf)
27. World Health Organisation. Rapid implementation of the Xpert MTB/RIF diagnostic test: technical and operational 'how to' practical considerations. WHO, Geneva, Switzerland. 2011; [http://whqlibdoc.who.int/publications/2011/9789241501569\\_eng.pdf](http://whqlibdoc.who.int/publications/2011/9789241501569_eng.pdf) Accessed January 13 2012.
